# Supplementary material for: Suboptimal MMR Vaccination Coverages—A Constant Challenge for Measles Elimination in Romania
Source: MDPI journal article supplement (doi:10.3390/vaccines12010107), 2024-01-22
Supplement: s1 [file s1]

**Table S1. Estimation Activity Results Reporting Form a vaccination coverage at the age of 12 months,  
held in August 2023 (children born in July 2022)**

County Public Health Directorate/Regional Centre of Public Health \_\_\_\_\_

| <b>Estimation of vaccination coverage (1)</b>                                                                                              |                                                                                          |   |                                 |     |                                      |        |                                 |   |   |   |   |        |  |
|--------------------------------------------------------------------------------------------------------------------------------------------|------------------------------------------------------------------------------------------|---|---------------------------------|-----|--------------------------------------|--------|---------------------------------|---|---|---|---|--------|--|
| Vaccine type                                                                                                                               | Number of children with the indicated number of vaccine doses in the vaccination history |   |                                 |     |                                      |        |                                 |   |   |   |   |        |  |
|                                                                                                                                            | <b>Urban</b>                                                                             |   |                                 |     |                                      |        | <b>Rural</b>                    |   |   |   |   |        |  |
|                                                                                                                                            | 4                                                                                        | 3 | 2                               | 1   | 0                                    | VC (%) | 4                               | 3 | 2 | 1 | 0 | VC (%) |  |
| BCG (Calmette – Guerin tuberculosis)                                                                                                       |                                                                                          |   |                                 |     |                                      |        |                                 |   |   |   |   |        |  |
| Hepatitis B paediatric                                                                                                                     |                                                                                          |   |                                 |     |                                      |        |                                 |   |   |   |   |        |  |
| DTPa (diphtheria, tetanus, pertussis acellular)                                                                                            |                                                                                          |   |                                 |     |                                      |        |                                 |   |   |   |   |        |  |
| Hib (Haemophilus influenzae b)                                                                                                             |                                                                                          |   |                                 |     |                                      |        |                                 |   |   |   |   |        |  |
| VPI (poliomyelitis)                                                                                                                        |                                                                                          |   |                                 |     |                                      |        |                                 |   |   |   |   |        |  |
| Pneumococcal                                                                                                                               |                                                                                          |   |                                 |     |                                      |        |                                 |   |   |   |   |        |  |
| MMR (measles, mumps, rubella)                                                                                                              |                                                                                          |   |                                 |     |                                      |        |                                 |   |   |   |   |        |  |
| <b>Total number of children investigated for vaccination antecedents (history)</b>                                                         | <b>Urban =</b>                                                                           |   |                                 |     |                                      |        | <b>Rural =</b>                  |   |   |   |   |        |  |
| <b>Evaluation of age-appropriate reasons for non-vaccination (2)</b>                                                                       |                                                                                          |   |                                 |     |                                      |        |                                 |   |   |   |   |        |  |
| Reasons for non-vaccination                                                                                                                | Number of unvaccinated children according to age, due to the reasons mentioned below     |   |                                 |     |                                      |        |                                 |   |   |   |   |        |  |
| Medical contraindication ( C )                                                                                                             | Contraindication type                                                                    |   | Number of unvaccinated children |     | Contraindication type                |        | Number of unvaccinated children |   |   |   |   |        |  |
| <ul style="list-style-type: none"> <li>If yes, mention the numbers not vaccinated with temporary or definitive C</li> </ul>                | temporary                                                                                |   |                                 |     | temporary                            |        |                                 |   |   |   |   |        |  |
|                                                                                                                                            | final                                                                                    |   |                                 |     | final                                |        |                                 |   |   |   |   |        |  |
| <ul style="list-style-type: none"> <li>Specify which definitive C and no. unvaccinated against type C</li> </ul>                           |                                                                                          |   |                                 |     |                                      |        |                                 |   |   |   |   |        |  |
| Parent/belonging refusal ( R )                                                                                                             | Refusal type/ vaccine                                                                    |   | Number of unvaccinated children |     | Refusal type/ vaccine                |        | Number of unvaccinated children |   |   |   |   |        |  |
| <ul style="list-style-type: none"> <li>If yes, general refusal (for all vaccines) or refusal for a certain type of vaccine</li> </ul>      | general                                                                                  |   |                                 |     | general                              |        |                                 |   |   |   |   |        |  |
|                                                                                                                                            | BCG (Calmette – Guerin tuberculosis)                                                     |   |                                 |     | BCG (Calmette – Guerin tuberculosis) |        |                                 |   |   |   |   |        |  |
|                                                                                                                                            | Hep B                                                                                    |   |                                 |     | Hep B                                |        |                                 |   |   |   |   |        |  |
|                                                                                                                                            | DTPa                                                                                     |   |                                 |     | DTPa                                 |        |                                 |   |   |   |   |        |  |
|                                                                                                                                            | Hib                                                                                      |   |                                 |     | Hib                                  |        |                                 |   |   |   |   |        |  |
|                                                                                                                                            | VPI                                                                                      |   |                                 |     | VPI                                  |        |                                 |   |   |   |   |        |  |
|                                                                                                                                            | Pneumococcal                                                                             |   |                                 |     | Pneumococcal                         |        |                                 |   |   |   |   |        |  |
|                                                                                                                                            | MMR                                                                                      |   |                                 |     | MMR                                  |        |                                 |   |   |   |   |        |  |
| No show/No announcement ( N )                                                                                                              |                                                                                          |   |                                 |     |                                      |        |                                 |   |   |   |   |        |  |
| Born/left abroad ( S )                                                                                                                     |                                                                                          |   |                                 |     |                                      |        |                                 |   |   |   |   |        |  |
| Omission ( O )                                                                                                                             |                                                                                          |   |                                 |     |                                      |        |                                 |   |   |   |   |        |  |
| Lack of vaccine ( L )                                                                                                                      | Vaccine type                                                                             |   | Number of unvaccinated children |     | Vaccine type                         |        | Number of unvaccinated children |   |   |   |   |        |  |
| <ul style="list-style-type: none"> <li>If there is no vaccine, yes, mention the number of unvaccinated for each type of vaccine</li> </ul> | BCG                                                                                      |   |                                 |     | BCG                                  |        |                                 |   |   |   |   |        |  |
|                                                                                                                                            | Hep B                                                                                    |   |                                 |     | Hep B                                |        |                                 |   |   |   |   |        |  |
|                                                                                                                                            | DTPa                                                                                     |   |                                 |     | DTPa                                 |        |                                 |   |   |   |   |        |  |
|                                                                                                                                            | Hib                                                                                      |   |                                 |     | Hib                                  |        |                                 |   |   |   |   |        |  |
|                                                                                                                                            | VPI                                                                                      |   |                                 |     | VPI                                  |        |                                 |   |   |   |   |        |  |
|                                                                                                                                            | Pneumococcal                                                                             |   |                                 |     | Pneumococcal                         |        |                                 |   |   |   |   |        |  |
| MMR                                                                                                                                        |                                                                                          |   |                                 | MMR |                                      |        |                                 |   |   |   |   |        |  |

|                                                               |                |                |
|---------------------------------------------------------------|----------------|----------------|
| <b>Total number of unvaccinated children according to age</b> | <b>Urban =</b> | <b>Rural =</b> |
|---------------------------------------------------------------|----------------|----------------|

**Number of vaccinating family doctors** \_\_\_\_\_

**National Electronic Vaccination Registry (NEVR) Survey:**

- No. of family doctors verified by survey (**minimum 30% of the number of vaccinating doctors**) = \_\_\_\_\_
- No. of family doctors where the results of the estimation of vaccination coverage, carried out according to the methodology, correspond to those in the NEVR = \_\_\_\_\_

Date : \_\_ / \_\_ / \_\_\_\_

Epidemiologist MD \_\_\_\_\_

### **Legend for Anex A:**

(1) Source of information: Child's medical consultation sheet, The register of vaccinations-revaccinations, tabel with monthly number of eligible children for vaccination, the National Electronic Register of Vaccinations

(2) Source of information: Child's medical consultation sheet

(C) = child with recorded visits to the family doctor's office and with at least one medical contraindication recorded in the child's medical consultation card, signed and initialed by the family doctor

(R) = child whose parent/belonging refuses to vaccinate the child and who certifies the refusal by signing the registration table; for parents who refuse to sign, the family doctor will mention this, under the signature, and the epidemiologist will check in the field, by survey, if this aspect is confirmed

(N) = child without recorded visits to the medical office

(S) = child born abroad, not vaccinated according to the age or whose parent/relative cannot prove, with medical documents, the vaccination according to the age

(O) = eligible child who has not been registered for vaccination

(L) = eligible child who has not been vaccinated due to lack of vaccine

(AV) = vaccination coverage = number of children vaccinated according to age X 100/total number of children investigated for vaccination antecedents
